# Supplementary material
Source: Springer Nature journal article supplement (https://www.springermedizin.de/resource/supplementary/12888_2012_1060_MOESM1_ESM.pdf/9479040)

**A random sample of 417 recruited through three diabetic outpatient clinics in Dhaka and Sylhet**

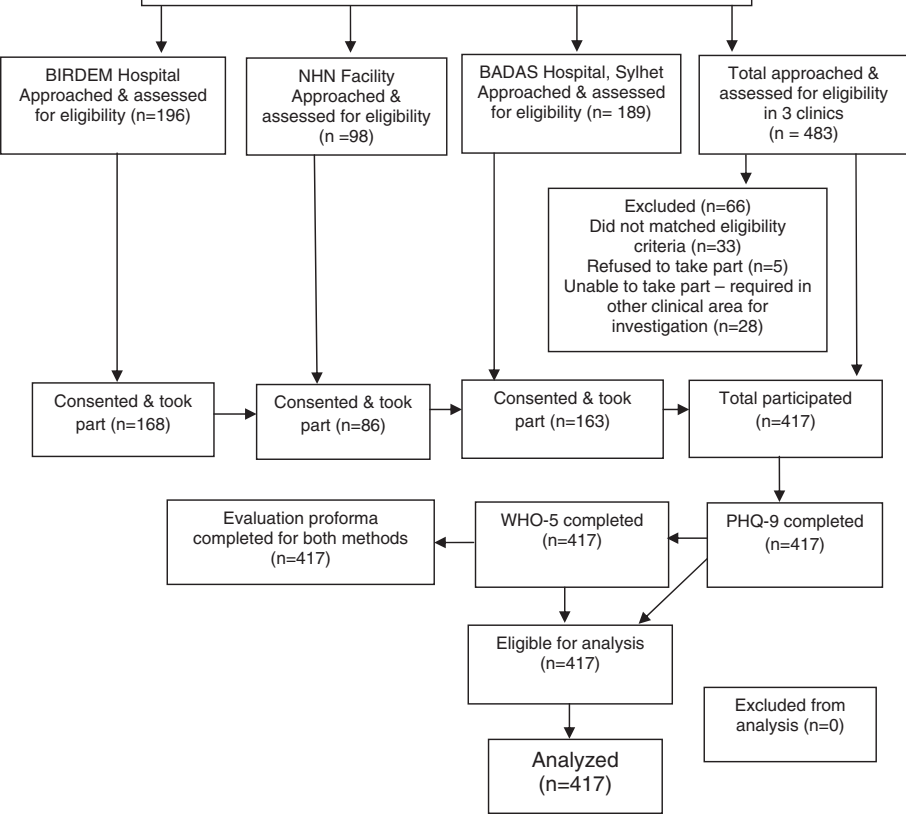

Supplement: MOESM1 [file 9479040]
